# Supplementary figures and images for: [Mnii2(bpym)(H2O)8]4+ and [Miv(CN)8]4– (M = Mo and W) as building blocks in designing bpym- and cyanide-bridged bimetallic three-dimensional networks (bpym = 2,2′-bipyrimidine)Electronic supplementary information (ESI) available: χMT vs. T for 2. See http://www.rsc.org/suppdata/nj/b2/b206124b/
Source: Royal Society of Chemistry journal article supplement (doi:10.1039/b206124b), 2002-11-22

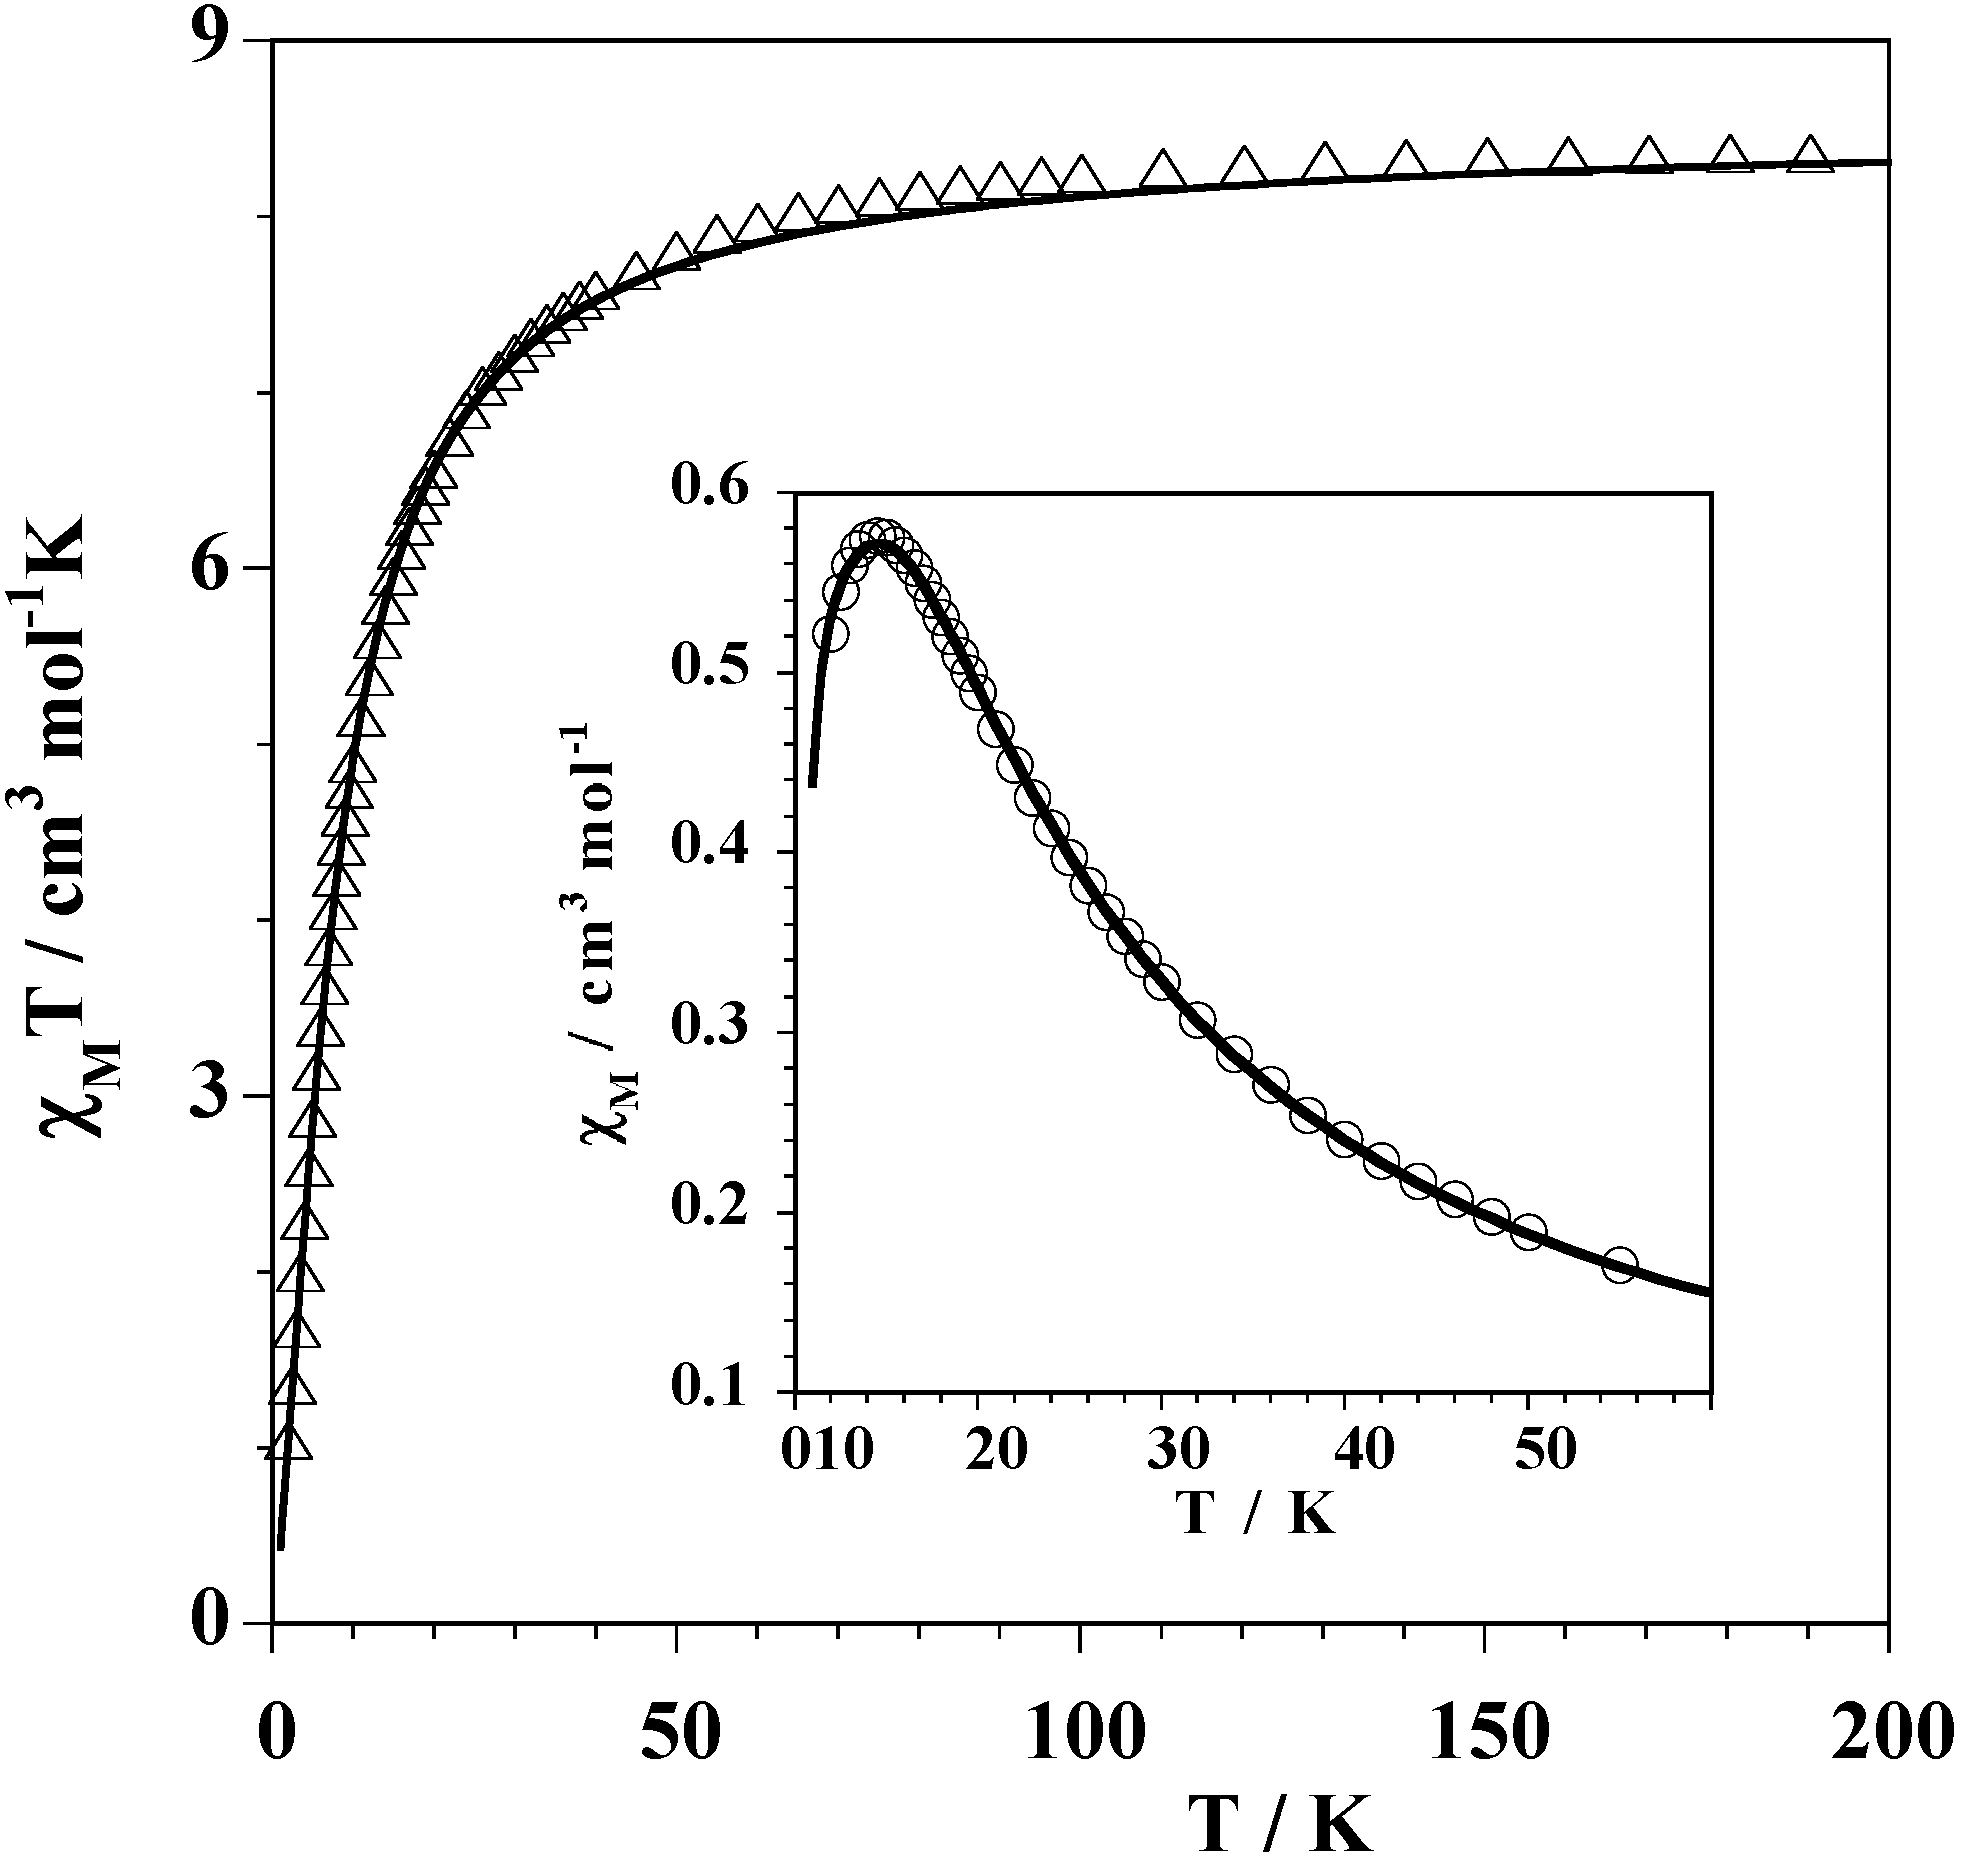

Supplement: b206124b.doc [file b206124b.doc]
